# Supplementary material
Source: PubMed Central journal article supplement (PMC8572687)
Supplement: 40699_2021_4098_MOESM1_ESM.pdf [file 40699_2021_4098_MOESM1_ESM.pdf]

## Supplementary Material

**Supplementary table 1.** Disease and treatment characteristics and their association with postponed/missed appointments.

| Characteristic                                   | Whole cohort                               | Postponed/missed appointments                  |                                                | <i>p</i> <sup>b</sup> |
|--------------------------------------------------|--------------------------------------------|------------------------------------------------|------------------------------------------------|-----------------------|
|                                                  | <i>n</i> =324 <sup>a</sup><br><i>n</i> (%) | Yes, <i>n</i> =48 <sup>a</sup><br><i>n</i> (%) | No, <i>n</i> =276 <sup>a</sup><br><i>n</i> (%) |                       |
| <b>AJCC 2017 stage</b>                           |                                            |                                                |                                                |                       |
| I                                                | 157 (48.5)                                 | 27 (56.3)                                      | 130 (47.1)                                     | 0.245                 |
| II                                               | 65 (20.1)                                  | 7 (14.6)                                       | 58 (21.0)                                      |                       |
| III                                              | 57 (17.6)                                  | 5 (10.4)                                       | 52 (18.8)                                      |                       |
| IV                                               | 45 (13.9)                                  | 9 (18.8)                                       | 36 (13.0)                                      |                       |
| <b>Disease duration<sup>c</sup></b>              |                                            |                                                |                                                |                       |
| <3 months                                        | 18 (5.6)                                   | 0 (0.0)                                        | 18 (6.5)                                       | 0.176                 |
| 3-12 months                                      | 72 (22.3)                                  | 7 (14.9)                                       | 65 (23.6)                                      |                       |
| >1-3 years                                       | 149 (46.1)                                 | 28 (59.6)                                      | 121 (43.8)                                     |                       |
| >3-5 years                                       | 47 (14.6)                                  | 6 (12.8)                                       | 41 (14.9)                                      |                       |
| >5-10 years                                      | 25 (7.7)                                   | 5 (10.6)                                       | 20 (7.2)                                       |                       |
| >10 years                                        | 12 (3.7)                                   | 1 (2.1)                                        | 11 (4.0)                                       |                       |
| <b>Current tumour burden</b>                     |                                            |                                                |                                                |                       |
| No                                               | 298 (92.0)                                 | 43 (89.6)                                      | 255 (92.4)                                     | 0.509                 |
| Yes                                              | 26 (8.0)                                   | 5 (10.4)                                       | 21 (7.6)                                       |                       |
| Primary melanoma                                 | 2 (0.6)                                    | 0 (0.0)                                        | 2 (0.7)                                        | 0.473                 |
| Regional lymph node metastases                   | 4 (1.2)                                    | 0 (0.0)                                        | 4 (1.4)                                        | 0.289                 |
| Satellite or in transit-metastases               | 5 (1.5)                                    | 2 (4.2)                                        | 3 (1.1)                                        | 0.190                 |
| Distant metastases                               | 21 (6.5)                                   | 5 (10.4)                                       | 16 (5.8)                                       | 0.225                 |
| <b>Current treatment<sup>d</sup></b>             |                                            |                                                |                                                |                       |
| No                                               | 220 (67.9)                                 | <b>41 (85.4)</b>                               | <b>179 (64.9)</b>                              | <b>0.005</b>          |
| Yes                                              | 104 (32.1)                                 | <b>7 (14.6)</b>                                | <b>97 (35.1)</b>                               |                       |
| <b>Kind of current treatment<sup>e</sup></b>     |                                            |                                                |                                                |                       |
| Patients                                         | 104 (100.0)                                | 7 (100.0)                                      | 97 (100.0)                                     |                       |
| <b>Surgery<sup>e</sup></b>                       | 49 (47.1)                                  | 4 (57.1)                                       | 45 (46.4)                                      | 0.582                 |
| Primary melanoma                                 | 39 (37.5)                                  | 2 (28.6)                                       | 37 (38.1)                                      | 0.613                 |
| SLNB                                             | 18 (17.3)                                  | 1 (14.3)                                       | 17 (17.5)                                      | 0.827                 |
| CLND                                             | 0 (0.0)                                    | 0 (0.0)                                        | 0 (0.0)                                        | n.a. <sup>f</sup>     |
| Other metastases                                 | 10 (9.6)                                   | 2 (28.6)                                       | 8 (8.2)                                        | 0.078                 |
| <b>Radiotherapy<sup>e</sup></b>                  | 3 (2.9)                                    | 0 (0.0)                                        | 3 (3.1)                                        | 0.637                 |
| <b>Systemic treatment<sup>e</sup></b>            | 66 (63.5)                                  | 5 (71.4)                                       | 61 (62.9)                                      | 0.650                 |
| Interferon- $\alpha$                             | 2 (1.9)                                    | 0 (0.0)                                        | 2 (2.1)                                        | 0.701                 |
| ICI                                              | 53 (51.0)                                  | 3 (42.9)                                       | 50 (51.5)                                      | 0.657                 |
| PD-1 inhibitor monotherapy                       | 50 (48.1)                                  | 3 (42.9)                                       | 47 (48.5)                                      | 0.662                 |
| Nivolumab + ipilimumab <sup>g</sup>              | 3 (2.9)                                    | 0 (0.0)                                        | 3 (3.1)                                        |                       |
| Ipilimumab monotherapy                           | 0 (0.0)                                    | 0 (0.0)                                        | 0 (0.0)                                        |                       |
| BRAF/MEK inhibitors                              | 13 (12.5)                                  | 2 (28.6)                                       | 11 (11.3)                                      | 0.183                 |
| <b>Systemic treatment intention<sup>e</sup></b>  |                                            |                                                |                                                |                       |
| Adjuvant                                         | 37 (35.6)                                  | 2 (28.6)                                       | 35 (36.1)                                      | 0.452                 |
| Palliative                                       | 29 (27.9)                                  | 3 (42.9)                                       | 26 (26.8)                                      |                       |
| <b>Response to current treatment<sup>e</sup></b> |                                            |                                                |                                                |                       |
| CR                                               | 77 (74.0)                                  | 4 (57.1)                                       | 73 (75.3)                                      | 0.367                 |
| PR                                               | 3 (2.9)                                    | 1 (14.3)                                       | 2 (2.1)                                        |                       |
| SD                                               | 10 (9.6)                                   | 1 (14.3)                                       | 9 (9.3)                                        |                       |
| PD                                               | 4 (3.8)                                    | 0 (0.0)                                        | 4 (4.1)                                        |                       |
| Not yet known                                    | 10 (9.6)                                   | 1 (14.3)                                       | 9 (9.3)                                        |                       |
| <b>Current treatment goal<sup>h</sup></b>        |                                            |                                                |                                                |                       |
| Total                                            | 105 (100.0)                                | 8 (100.0) <sup>h</sup>                         | 97 (100.0)                                     |                       |
| Curative                                         | 77 (73.3)                                  | 5 (62.5)                                       | 72 (74.2)                                      | 0.870                 |
| Palliative                                       | 28 (26.7)                                  | 3 (37.5)                                       | 25 (25.8)                                      | 0.325                 |
| <b>Treatment experience<sup>a,i</sup></b>        |                                            |                                                |                                                |                       |
| <b>Surgery</b>                                   | 322 (99.4)                                 | 48 (100.0)                                     | 274 (99.3)                                     | 0.554                 |
| Primary melanoma                                 | 314 (96.9)                                 | 47 (97.9)                                      | 267 (96.7)                                     | 0.663                 |
| SLNB                                             | 219 (67.6)                                 | 35 (72.9)                                      | 184 (66.7)                                     | 0.393                 |
| CLND                                             | 53 (16.4)                                  | 6 (12.5)                                       | 47 (17.0)                                      | 0.434                 |
| Other metastases                                 | 48 (14.8)                                  | 8 (16.7)                                       | 40 (14.5)                                      | 0.696                 |
| <b>Radiotherapy</b>                              | 19 (5.9)                                   | 2 (4.2)                                        | 17 (6.2)                                       | 0.588                 |
| <b>Systemic treatment</b>                        | 104 (32.1)                                 | 12 (25.0)                                      | 92 (33.3)                                      | 0.254                 |
| Interferon- $\alpha$                             | 34 (10.5)                                  | 4 (8.3)                                        | 30 (10.9)                                      | 0.597                 |
| ICI                                              | 78 (24.1)                                  | 9 (18.8)                                       | 69 (25.0)                                      | 0.350                 |
| PD-1 inhibitor monotherapy                       | 71 (21.9)                                  | 8 (16.7)                                       | 63 (22.8)                                      | 0.169                 |
| Nivolumab + ipilimumab <sup>g</sup>              | 5 (1.6)                                    | 0 (0.0)                                        | 5 (1.8)                                        |                       |
| Ipilimumab monotherapy                           | 2 (0.6)                                    | 1 (2.1)                                        | 1 (0.4)                                        |                       |
| BRAF/MEK inhibitors                              | 16 (4.9)                                   | 3 (6.3)                                        | 13 (4.7)                                       | 0.650                 |
| Chemotherapy                                     | 6 (1.9)                                    | 1 (2.1)                                        | 5 (1.8)                                        | 0.897                 |
| Other <sup>j</sup>                               | 6 (1.9)                                    | 0 (0.0)                                        | 6 (2.2)                                        | 0.302                 |

- <sup>a</sup> For calculation of proportions, the total number of participants in each group was set at 100%. Percentages do not always add up to 100% due to rounding and multiple answers.
- <sup>b</sup> Differences between participants who postponed/missed their appointment and participants who kept all appointments were tested for significance using the Chi-square test.
- <sup>c</sup> Missing data: disease duration n=1.
- <sup>d</sup> Current treatments comprised all melanoma therapies obtained between February 1<sup>st</sup> 2020 and the date of study participation.
- <sup>e</sup> Percentages refer to all patients with current treatment (n=104, n=7 or n=97, 100%).
- <sup>f</sup> N.a.: not assessed.
- <sup>g</sup> Combination therapy with nivolumab and ipilimumab was routinely followed by nivolumab monotherapy.
- <sup>h</sup> One participant first obtained surgery with curative intention and subsequently required palliative systemic treatment. Therefore, n=105 was set at 100%.
- <sup>i</sup> All treatments ever received, either currently or in the past.
- <sup>j</sup> Other treatments included hyperthermic limb perfusion (n=1), electrochemotherapy (n=1), cryotherapy (n=2), laser treatment (n=1) and radiofrequency ablation (n=2). One patient received both hyperthermic limb perfusion and electrochemotherapy. Significant findings are highlighted in bold.
- AJCC: American Joint Committee on Cancer; CLND: complete lymph node dissection; CR: complete response; ICI: immune checkpoint inhibitors; n: number; PD: progressive disease; PR: partial response; SD: stable disease; SLNB: sentinel lymph node biopsy.

**Supplementary table 2.** Treatment changes or postponement due to the pandemic.

| <b>Characteristics</b>                                                                                                                       | <b>Patient 1</b>                                                                                                                                                                                                    | <b>Patient 2</b>                                                                                                                                      | <b>Patient 3</b>                                                                                                                             | <b>Patient 4</b>                                                                                   |
|----------------------------------------------------------------------------------------------------------------------------------------------|---------------------------------------------------------------------------------------------------------------------------------------------------------------------------------------------------------------------|-------------------------------------------------------------------------------------------------------------------------------------------------------|----------------------------------------------------------------------------------------------------------------------------------------------|----------------------------------------------------------------------------------------------------|
| <b>Sex</b><br><b>Age</b><br><b>AJCC stage</b><br><b>Current tumour burden</b><br><b>Kind of tumour burden</b>                                | male<br>54<br>IV<br>yes<br>brain and lung metastasis                                                                                                                                                                | female<br>85<br>IIB<br>yes<br>R1 situation after primary melanoma excision                                                                            | female<br>30<br>IB<br>no                                                                                                                     | female<br>54<br>IIID<br>no                                                                         |
| <b>Current treatment</b><br><br><b>Treatment intention</b><br><b>Kind of change</b>                                                          | surgery of brain and lung metastasis, radiotherapy, pembrolizumab<br>palliative<br>hypofractionated radiotherapy after neurosurgery of the brain metastasis (6 sessions with 4 Gy instead of 12 sessions with 3 Gy) | wide excision with 2 cm margins<br><br>curative<br>wide excision with safely margins delayed for 4 weeks due to COVID-19 outbreak in another hospital | wide excision with 1 cm margins, SLND<br><br>curative<br>wide excision with safety margins and SLND delayed for 4 weeks on patient's request | adjuvant pembrolizumab<br><br>curative<br>pembrolizumab 400 mg 6-weekly instead of 200 mg 3-weekly |
| <b>Level of concern for COVID-19</b><br>Scale 0-100<br>5-point scale<br><b>Level of concern for melanoma</b><br>Scale 0-100<br>5-point scale | 68<br>High<br><br>60<br>Moderate                                                                                                                                                                                    | 20<br>Low<br><br>20<br>Low                                                                                                                            | 30<br>Moderate<br><br>100<br>Very high                                                                                                       | 20<br>Low<br><br>25<br>Moderate                                                                    |
| <b>EQ-5D-5L</b>                                                                                                                              | 0.799                                                                                                                                                                                                               | 0.369                                                                                                                                                 | 0.756                                                                                                                                        | 0.913                                                                                              |
| <b>Comorbidities</b>                                                                                                                         | Hypothyroidism, second melanoma                                                                                                                                                                                     | hypertension, COPD, renal insufficiency, arthrosis, restless legs                                                                                     | none                                                                                                                                         | arthropathy, autoimmune thyroiditis, allergies, unilateral deafness                                |

*AJCC: American Joint Committee on Cancer; COPD: chronic obstructive pulmonary disease; EQ-5D-5L: EuroQoL 5-Dimension 5-Level health-related quality of life score; Gy: grey; SLND: sentinel lymph node biopsy.*

**Supplementary table 3.** Comorbidities and their association with postponed/missed appointments.

| Comorbidity                                        | Whole cohort                               | Postponed/missed appointment                   |                                                | <i>p</i> <sup>b</sup> |
|----------------------------------------------------|--------------------------------------------|------------------------------------------------|------------------------------------------------|-----------------------|
|                                                    | <i>n</i> =324 <sup>a</sup><br><i>n</i> (%) | Yes, <i>n</i> =48 <sup>a</sup><br><i>n</i> (%) | No, <i>n</i> =276 <sup>a</sup><br><i>n</i> (%) |                       |
| Hypertension                                       | 181 (55.9)                                 | 28 (58.3)                                      | 153 (55.4)                                     | 0.709                 |
| Other cardiovascular diseases                      | 108 (33.3)                                 | 16 (33.3)                                      | 92 (33.3)                                      | 1.000                 |
| Pulmonary diseases                                 | 41 (12.7)                                  | 7 (14.6)                                       | 34 (12.3)                                      | 0.663                 |
| Hepatic diseases                                   | 27 (8.3)                                   | 5 (10.4)                                       | 22 (8.0)                                       | 0.572                 |
| Renal diseases                                     | 40 (12.3)                                  | 6 (12.5)                                       | 34 (12.3)                                      | 0.972                 |
| Urologic diseases                                  | 33 (10.2)                                  | 5 (10.4)                                       | 28 (10.1)                                      | 0.954                 |
| Gastrointestinal diseases                          | 41 (12.7)                                  | 5 (10.4)                                       | 36 (13.0)                                      | 0.613                 |
| Ophthalmologic diseases                            | 25 (7.7)                                   | 6 (12.5)                                       | 19 (6.9)                                       | 0.178                 |
| Diabetes mellitus                                  | 56 (17.3)                                  | 10 (20.8)                                      | 46 (16.7)                                      | 0.481                 |
| Arthropathy                                        | 139 (42.9)                                 | 23 (47.9)                                      | 116 (60.1)                                     | 0.447                 |
| Thyroid disease                                    | 101 (31.2)                                 | 12 (25.0)                                      | 89 (32.2)                                      | 0.317                 |
| Autoimmune disease                                 | 4 (1.2)                                    | 0 (0.0)                                        | 4 (1.4)                                        | 0.401                 |
| Immunosuppression                                  | 15 (4.6)                                   | 4 (8.3)                                        | 11 (4.0)                                       | 0.186                 |
| Allergies                                          | 89 (27.5)                                  | 15 (31.3)                                      | 74 (26.8)                                      | 0.525                 |
| Depression                                         | 27 (8.3)                                   | 6 (12.5)                                       | 21 (7.6)                                       | 0.258                 |
| Anxiety disorder                                   | 15 (4.6)                                   | <b>6 (12.5)</b>                                | <b>9 (3.3)</b>                                 | <b>0.005</b>          |
| Other mental illnesses                             | 4 (1.2)                                    | 1 (2.1)                                        | 3 (1.1)                                        | 0.564                 |
| Dyslipidaemia                                      | 104 (32.1)                                 | 15 (31.3)                                      | 89 (32.2)                                      | 0.891                 |
| Cancer                                             |                                            |                                                |                                                |                       |
| ≥2 MM or additional MM <i>in situ</i> <sup>c</sup> | 36 (11.1)                                  | 6 (12.5)                                       | 30 (10.9)                                      | 0.747                 |
| Other skin cancer                                  | 34 (10.5)                                  | 6 (12.5)                                       | 28 (10.1)                                      | 0.623                 |
| Other cancer                                       | 51 (15.8)                                  | 11 (22.9)                                      | 40 (14.5)                                      | 0.142                 |
| Other comorbidities                                | 99 (30.6)                                  | 17 (35.4)                                      | 82 (29.7)                                      | 0.428                 |
| No comorbidity                                     | 28 (8.6)                                   | 3 (6.3)                                        | 25 (9.1)                                       | 0.523                 |
| ≥5 comorbidities                                   | 139 (42.9)                                 | 25 (52.1)                                      | 114 (41.3)                                     | 0.164                 |

<sup>a</sup> For calculation of proportions, the number of participants in each group was set at 100%.

<sup>b</sup> Differences between participants who postponed/missed their appointment and participants who kept all appointments were tested for significance using the Chi-square test.

<sup>c</sup> missing data: ≥2 MM or additional MM *in situ* *n*=1.

Significant findings are highlighted in bold. MM: malignant melanoma.

**Supplementary figure 1.** Number of new SARS-CoV-2 infections per day in Germany and Berlin between February 1<sup>st</sup> 2020 and July 1<sup>st</sup> 2020.

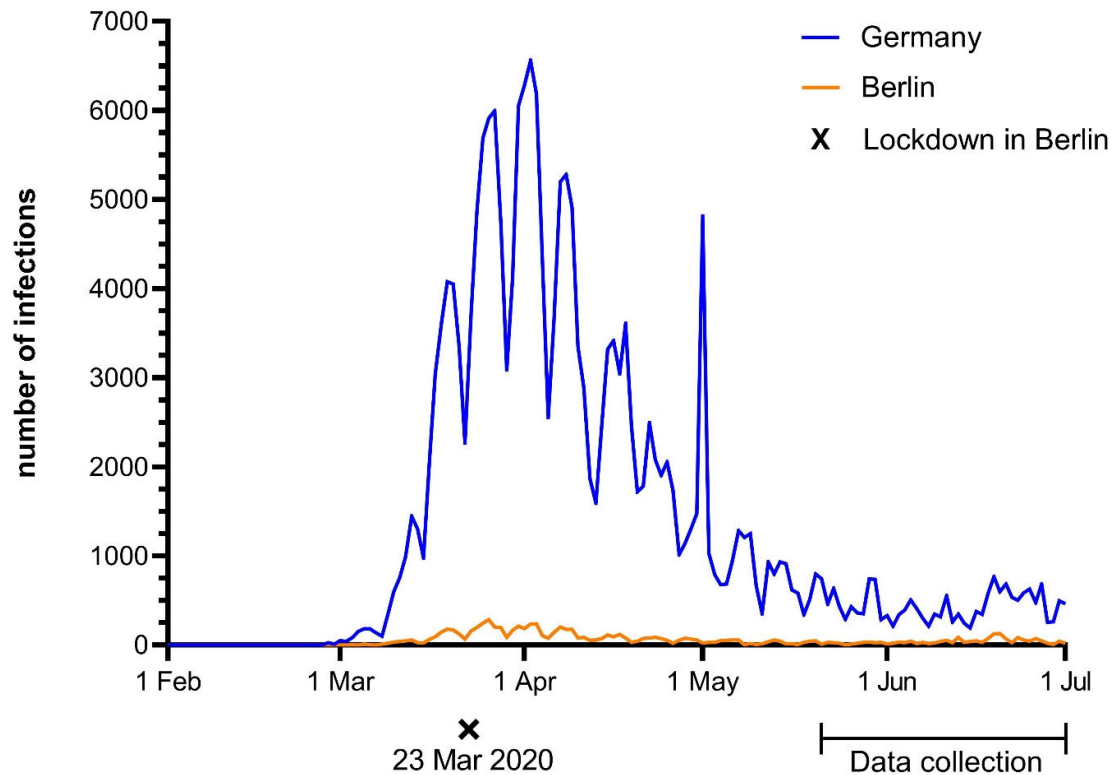

Sources:

WHO coronavirus disease (COVID-19) dashboard. Geneva: World Health Organization, 2020. Available at: <https://covid19.who.int/> (accessed 2020-08-05).

Robert-Koch-Institute: COVID-19-Dashboard 2020. Available at:

[https://experience.arcgis.com/experience/478220a4c454480e823b17327b2bf1d4/page/page\\_1/](https://experience.arcgis.com/experience/478220a4c454480e823b17327b2bf1d4/page/page_1/) (accessed 2020-08-07).
